# Supplementary material
Source: ML conference proceedings conference paper supplement (https://openreview.net/forum?id=x8gM-4nFq9b)
Supplement: supplementary_material [file attachment]

## Appendix

We provide a sketch of the code and additional experiments for our defensive entropy method (dent). Section A includes the high-level code for dent (in PyTorch). The additional experiments cover more defenses and dent ablations (Section B) and more attacks (Section C).

### A Code Sketch

---

```
class DynamicModel(torch.nn.Module):
    ... # needs __init__() for optimizer, etc.

    @torch.enable_grad()
    def _update(self, inputs):
        # Perform the forward pass
        preds = self.model(inputs)
        # Compute the loss
        losses = self.loss(preds)
        # Perform the backward pass
        self.optimizer.zero_grad()
        losses.backward(retain_graph=True)
        # Update the parameters
        self.optimizer.step()

    def forward(self, x):
        # Adaptation
        self.model.train()
        for _ in range(self.max_iter):
            self._update(x)
        # Inference
        self.model.eval()
        y = self.model(x)
        return y
```

---

Listing 1: Sketch of dent code in PyTorch. Adaptation updates are made during testing in `forward()`.

Here is a sketch of our PyTorch implementation of dent. The code is simple, and self-contained, for easy application to existing models and defenses. Compatibility with existing defenses is important, as our experiments show that the boost from our dynamic defense compounds the robustness of static defenses. This compounding improvement should continue to help as static and dynamic defenses both improve.

### B More Results

**Defenses, Architectures, and Datasets** Table 9 experiments across more defenses, architectures, and datasets. These experiments need to re-train the static defenses, so we reproduce the popular AT [31] and TRADES [67] defenses. We train by PGD with 10-step optimization, norm bounds of  $\epsilon_\infty = 8/255$  and  $\epsilon_2 = 0.5$ , and step sizes of  $\alpha_\infty = 2/255$  and  $\alpha_2 = 0.1$ .

**Defense Objective** Dent minimizes entropy, as inspired by tent [60]. Related work includes regularization to instead maximize information [29] with a term that encourages class balance across predictions. Table 10 ablates this regularization to show that our dynamic defense is not too sensitive to it.

Table 9: Dent improves accuracy against  $\ell_\infty$  AutoAttack across model and dataset sizes.

| ACCURACY(%)       | DATA      | ARCH    | NATURAL |      | ADVERSARIAL |      |
|-------------------|-----------|---------|---------|------|-------------|------|
|                   |           |         | STATIC  | DENT | STATIC      | DENT |
| MADRY ET AL. [31] | CIFAR-10  | R-26-4  | 85.8    | 86.5 | 43.8        | 50.4 |
|                   | CIFAR-100 | R-26-4  | 59.0    | 60.1 | 20.4        | 23.5 |
|                   | CIFAR-10  | R-32-10 | 87.0    | 86.7 | 45.0        | 52.5 |
| ZHANG ET AL. [67] | CIFAR-10  | R-26-4  | 85.2    | 86.6 | 48.0        | 49.2 |
|                   | CIFAR-100 | R-26-4  | 60.1    | 62.4 | 18.0        | 22.5 |
|                   | CIFAR-10  | R-32-10 | 85.8    | 86.0 | 48.0        | 56.0 |

Table 10: Ablation of defense objective: entropy minimization (minent) or information maximization (maxinf) for a nominal model against  $\epsilon_\infty = 1.5/255$  and robust model against  $\epsilon_\infty = 8/255$ . Dynamic defense is not sensitive to this choice, as both are entropic objectives, and the updates from either improve accuracy.

|                   | NATURAL |        | ADVERSARIAL |        |
|-------------------|---------|--------|-------------|--------|
|                   | MINENT  | MAXINF | MINENT      | MAXINF |
| NOMINAL MODEL     | 86.5    | 86.4   | 50.4        | 50.0   |
| MADRY ET AL. [31] | 92.5    | 92.7   | 45.4        | 45.9   |

**Steps and Computation** As dent is iterative, the amount of computation and adaptation can be balanced by choosing the number of steps. Table 11 measures adversarial accuracy across steps for nominal and adversarial training. To appreciate the computation required, we profile the time and FLOPs for dent with a ResNet-50 model on the ImageNet dataset (Table 12), with an input size of  $288 \times 288$  and a batch size of 16. Our experiments show that dent updates do not immediately saturate: more steps still yield more robustness. However, these steps take more time, motivating further investigation to tune defensive optimization and reduce the necessary computation.

## C More Attacks

We evaluate dent against attacks with more iterations and higher norm bounds. In the same vein, we evaluate against the expanded benchmark of AutoAttack Plus: this applies the same four attack types as AutoAttack but with higher computational budgets. As AutoAttack only includes one black-box attack (Square), we also evaluate against the Boundary attack [5], for broader coverage of the black-box setting.

**Attacks with More Iterations** It is important to evaluate defenses against sufficiently strong attacks. We ablate the number of steps for APGD-CE, an attack used by AutoAttack, to check its effectiveness (Table 13). Results indicate that 100 iterations are sufficient, with diminishing returns for more iterations. Therefore, standard AutoAttack’s configuration is sufficient for evaluating dent’s robustness.

**Attacks with Higher Norm Bounds** Sufficiently large norm bounds should allow attacks to reach a high success rate. Figure 4 shows that dent’s robust accuracy with a nominal model decreases as we increase the norm bounds for both  $\ell_\infty$  and  $\ell_2$  attacks. Specifically, our attacks for evaluating dent’s  $\ell_\infty$  and  $\ell_2$  robustness can successfully find adversarial examples with sufficiently large norm bounds. Meanwhile, Figure 4 demonstrates that dent consistently improves the nominal model’s robustness against attacks of various strength.

**Attacks with AutoAttack Plus** To further analyze dent’s robustness against AutoAttack, we benchmark dent against AutoAttack Plus, an extended version of AutoAttack. Table 14 confirms that dent’s improves the static model’s adversarial accuracy against various attacks. Furthermore, dent’s

Table 11: Ablation of optimization iterations per defense update. More steps deliver more accuracy across models and attacks.

| ACCURACY(%)                                | 0    | 5    | 10   | 20   | 30   |
|--------------------------------------------|------|------|------|------|------|
| RESNET-26-4 [BARE MODEL]                   |      |      |      |      |      |
| $\epsilon_\infty = 1.5/255$                | 8.8  | 36.1 | 45.4 | 49.6 | 51.0 |
| $\epsilon_2 = 0.2$                         | 9.2  | 28.0 | 36.5 | 39.8 | 41.7 |
| RESNET-26-4 [MADRY ET AL. [31]]            |      |      |      |      |      |
| $\epsilon_\infty = 8/255$                  | 43.8 | 46.3 | 50.4 | 56.0 | 58.9 |
| $\epsilon_2 = 0.5$                         | 47.3 | 48.8 | 53.0 | 56.4 | 57.7 |
| RESNET-32-10 [ $\epsilon_\infty = 8/255$ ] |      |      |      |      |      |
| MADRY ET AL. [31]                          | 45.0 | 47.7 | 52.5 | 57.1 | 58.7 |
| ZHANG ET AL. [67]                          | 48.0 | 48.8 | 56.0 | 64.1 | 67.1 |

Table 12: Profiling dent computation in time (seconds) and operations (FLOPs) for the dynamic defense of a ResNet-50 on ImageNet. The batch size is 16, and the computation includes all operations for forward, backward, and optimization.

|                       | 0   | 1   | 5    | 10   | 20   | 30   | 40   | 50    |
|-----------------------|-----|-----|------|------|------|------|------|-------|
| ABSOLUTE (S)          | 0.1 | 0.3 | 1.1  | 2.2  | 4.2  | 6.5  | 8.6  | 10.8  |
| RELATIVE ( $\times$ ) | 1.0 | 3.4 | 12.8 | 25.3 | 49.1 | 75.9 | 99.9 | 125.3 |

adversarial accuracy reported in Table 14 is comparable to the standard AutoAttack, indicating that our evaluation of dent’s robustness is sufficient.

**Boundary Attack** For breadth, we evaluate dent against the Boundary black-box decision-based attack [5]. Our main experiments measure dent’s robustness to AutoAttack, including its black-box Square attack [2]. Square is a score-based attack, which relies on the confidence of predictions. As dent optimizes confidence by entropy minimization, it may interfere with such score-based attacks. We experiment with Boundary as an alternative, because decision-based attacks rely only on the classification and not the confidence.

We attack an adversarially-trained model [13] equipped with dent, and compare Boundary with AutoAttack in Table 15. The Boundary attack is weaker than the AutoAttack ensemble with or without dent. By default, Boundary is initialized with an unbounded perturbation by adding noise, but this is not effective against dent. We attempted to strengthen the attack by nearest neighbor initialization from misclassifications in the validation set. Our Boundary evaluation is based on the implementation in the Foolbox toolkit [39].

Table 13: Checking attack effectiveness against one iteration of dent. For  $\epsilon_\infty = 8/255$  APGD-CE attacks Madry et al. [31] 100 steps sufficiently reduce adversarial accuracy to evaluate dent.

| 1    | 2    | 3    | 6    | 13   | 25   | 50   | 100  | 200  | 400  | 800  |
|------|------|------|------|------|------|------|------|------|------|------|
| 63.2 | 59.6 | 56.6 | 53.1 | 50.8 | 49.9 | 49.5 | 49.4 | 49.0 | 49.1 | 49.0 |

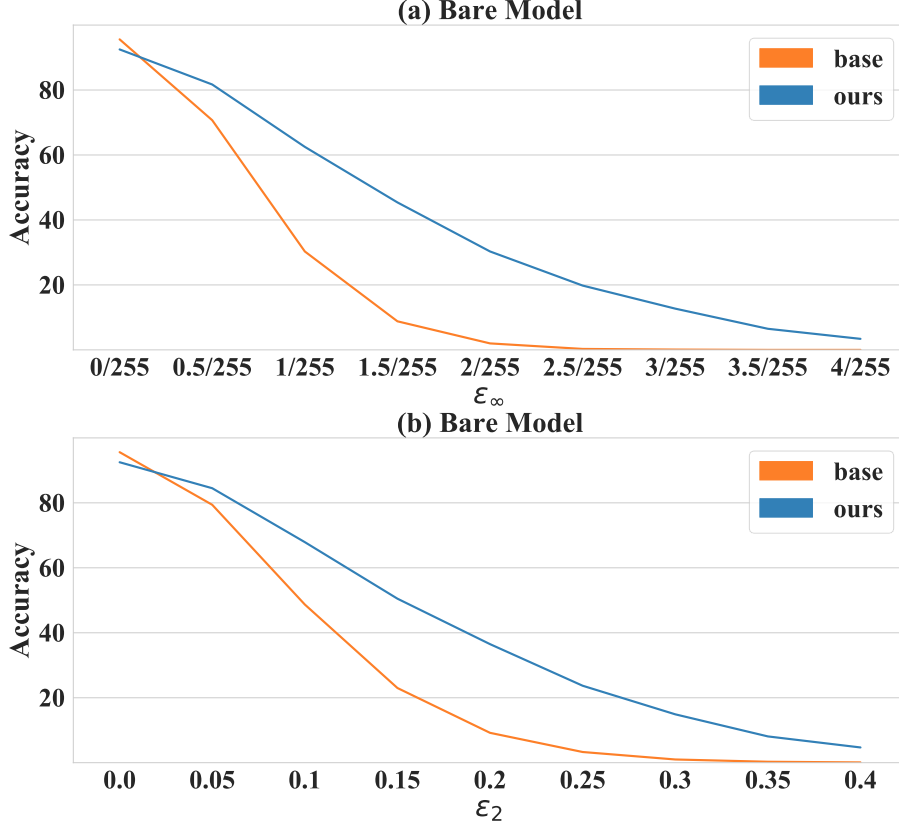

Figure 4: Adversarial accuracy of a nominal model against attacks with varied norm bounds on CIFAR-10. Our dynamic defense consistently improves the robustness of the static model. With sufficiently high bounds however, the attacks succeed in breaking dent’s defense.

Table 14: Benchmark of dent against  $\ell_\infty$  and  $\ell_2$  norm-bounded attacks on CIFAR-10 by AutoAttack and AutoAttack Plus. AutoAttack Plus only reduces dent’s adversarial accuracy a little, and so the standard AutoAttack is sufficient for evaluation.

| ACCURACY(%)                                     | NATURAL | AUTOATTACK | AUTOATTACK+ |
|-------------------------------------------------|---------|------------|-------------|
| NOMINAL MODEL ( $\epsilon_\infty = 1.5/255$ )   |         |            |             |
| STATIC                                          | 95.6    | 8.8        | 8.6         |
| DENT                                            | 92.5    | 45.4       | 38.3        |
| MADRY ET AL. [31] ( $\epsilon_\infty = 8/255$ ) |         |            |             |
| STATIC                                          | 85.8    | 43.8       | 43.8        |
| DENT                                            | 86.5    | 50.4       | 48.0        |
| DING ET AL. [13] ( $\epsilon_\infty = 8/255$ )  |         |            |             |
| STATIC                                          | 87.5    | 41.4       | 35.2        |
| DENT                                            | 87.6    | 47.6       | 45.1        |

Table 15: Dent is robust to black-box attacks, including AutoAttack (Square) and Boundary under  $\epsilon_2 = 1.5$ . Square is score-based while Boundary is decision-based. The AutoAttack ensemble is the more effective attack overall, so we choose it for our primary evaluation.

| ACCURACY(%) | NATURAL | AUTOATTACK | BOUNDARY |
|-------------|---------|------------|----------|
| [13]        | 88.0    | 41.4       | 72.8     |
| + DENT      | 87.9    | 47.6       | 70.8     |
